# Supplementary material for: Role of iRhom2 in intestinal ischemia-reperfusion-mediated acute lung injury
Source: PubMed Central journal article supplement (PMC5830505; doi:10.1038/s41598-018-22218-8), 2018-02-28
Supplement: 41598_2018_22218_MOESM1_ESM.pdf [file 41598_2018_22218_MOESM1_ESM.pdf]

# **Role of iRhom2 in intestinal ischemia-reperfusion-mediated acute lung injury**

Jee Hyun Kim<sup>1</sup>, Jihye Kim<sup>2</sup>, Jaeyoung Chun<sup>2</sup>, Changhyun Lee<sup>3</sup>, Jong Pil Im<sup>2</sup> and Joo Sung Kim<sup>2,3</sup>

**Supplementary Info File**

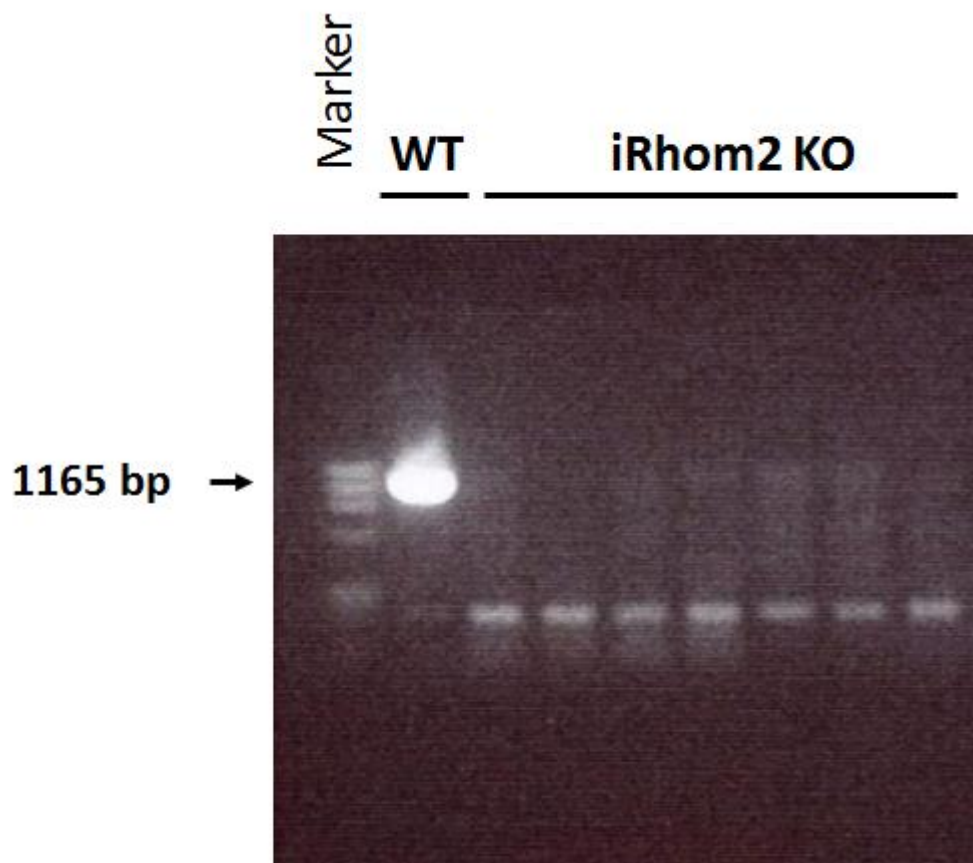

**Supplementary Figure 1. PCR genotyping of iRhom2 knockout (KO) mice.** iRhom2 gene KO was confirmed in the iRhom2 KO mice by PCR genotyping of colonic tissue DNA. The arrow indicates the amplified iRhom2 fragment (1165 bp).

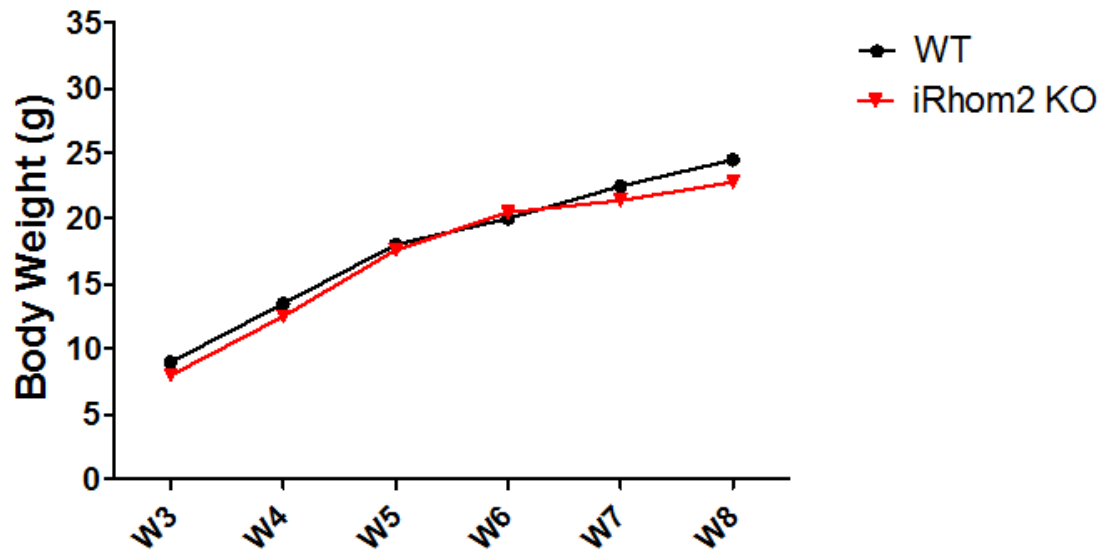

**Supplementary Figure 2. Body weight in wild-type (WT) and iRhom2 knockout (KO) mice.** The WT and iRhom2 KO mice were weighed weekly starting at an age of 3 weeks. No significant difference was observed between the iRhom2 KO mice and WT mice at any time point.
